# Supplementary material for: Psychosen aus dem schizophrenen Formenkreis im Jugendalter: Einflussfaktoren auf Neuropsychologie, Behandlungserfolg und Negativsymptomatik
Source: Atypon-hosted journal article supplement (doi:10.1024/1422-4917/a000903), 2022-10-07
Supplement: 1422-4917_a000903_esm1.pdf [file 1422-4917_a000903_esm1.pdf]

## **ESM**

### **Elektronisches Supplement 1. Dissertationstitel**

„Verlaufsuntersuchung von Bewohner/-innen der Leppermühle mit der Diagnose einer Psychose aus dem schizophrenen Formenkreis: Psychopathologie, psychosoziales Funktionsniveau und Lebensqualität zu Beginn der Verlaufsuntersuchung – Reevaluation anhand einer unabhängigen Stichprobe“, Katharina Zechbauer 2019, Albert-Ludwigs-Universität Freiburg im Breisgau.

„Verlaufsuntersuchung von der Leppermühle mit der Diagnose einer Psychose aus dem schizophrenen Formenkreis: Neuropsychologie, Behandlungszufriedenheit und Medikation zu Beginn des Follow-ups – Reevaluation anhand einer unabhängigen Stichprobe“, Lisette Herwerth 2019, Albert-Ludwigs-Universität Freiburg im Breisgau.
