# Supplementary material for: Psychosen aus dem schizophrenen Formenkreis im Jugendalter: Einflussfaktoren auf Neuropsychologie, Behandlungserfolg und Negativsymptomatik
Source: Atypon-hosted journal article supplement (doi:10.1024/1422-4917/a000903), 2022-10-07
Supplement: 1422-4917_a000903_esm2.pdf [file 1422-4917_a000903_esm2.pdf]

# ESM

## Elektronisches Supplement 2

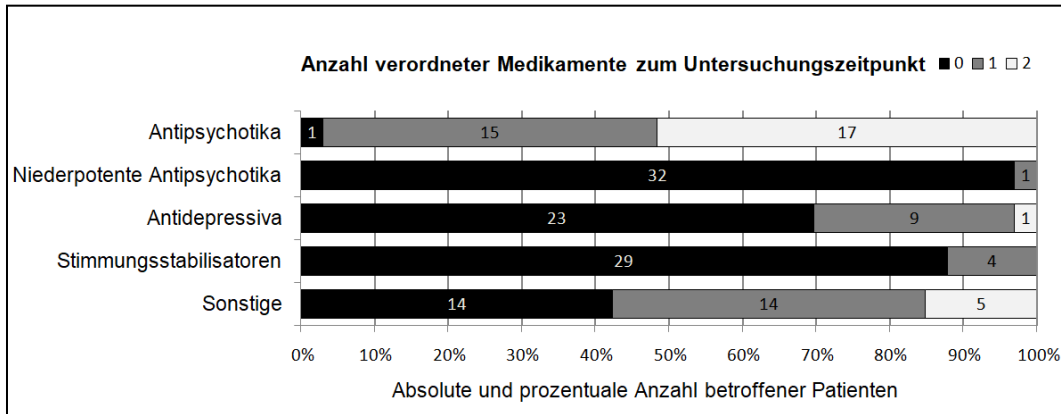

**Abbildung 1.** Dauermedikation der 33 Patienten zum Untersuchungszeitpunkt bezogen auf die Anzahl verordneter Präparate.

## Elektronisches Supplement 2

**Tabelle 1.** Dauermedikation der 33 Patienten zum Untersuchungszeitpunkt in absoluten Zahlen (N) und Prozentangabe bezogen auf die jeweilige Medikamentengruppe.

Mehrfachnennungen waren möglich

| <b>Medikation</b>                   | <b>N</b> | <b>[%]</b> |
|-------------------------------------|----------|------------|
| <b>Antipsychotika</b>               |          |            |
| Clozapin                            | 15       | 31         |
| Aripiprazol                         | 13       | 27         |
| Risperidon                          | 7        | 14         |
| Olanzapin                           | 6        | 12         |
| Amisulprid                          | 3        | 6          |
| Quetiapin                           | 3        | 6          |
| Sulpirid                            | 2        | 4          |
| Gesamt                              | 49       |            |
| <b>Niederpotente Antipsychotika</b> |          |            |
| Pipamperon                          | 1        | 100        |
| Gesamt                              | 1        |            |
| <b>Antidepressiva</b>               |          |            |
| Citalopram                          | 2        | 18         |
| Escitalopram                        | 2        | 18         |
| Fluoxetin                           | 2        | 18         |
| Venlafaxin                          | 2        | 18         |
| Imipramin                           | 1        | 9          |
| Mirtazapin                          | 1        | 9          |
| Sertralin                           | 1        | 9          |
| Gesamt                              | 11       |            |
| <b>Stimmungsstabilisatoren</b>      |          |            |
| Valproat                            | 2        | 50         |
| Lamotrigin                          | 1        | 25         |
| Lithium                             | 1        | 25         |
| Gesamt                              | 4        |            |
| <b>Sonstige</b>                     |          |            |
| B-Blocker                           | 9        | 38         |
| Pirenzepin                          | 9        | 38         |
| Biperiden                           | 5        | 20         |
| Allopurinol                         | 1        | 4          |
| Gesamt                              | 24       |            |
